# Supplementary material for: microRNA-1203 targets and silences cyclophilin D to protect human endometrial cells from oxygen and glucose deprivation-re-oxygenation
Source: publisher site journal article supplement (doi:10.18632/aging.102795), 2020-02-10
Supplement: Supplementary file [file aging-v12i3-102795-supplementary-material-SD1.pdf]

## SUPPLEMENTARY FIGURE

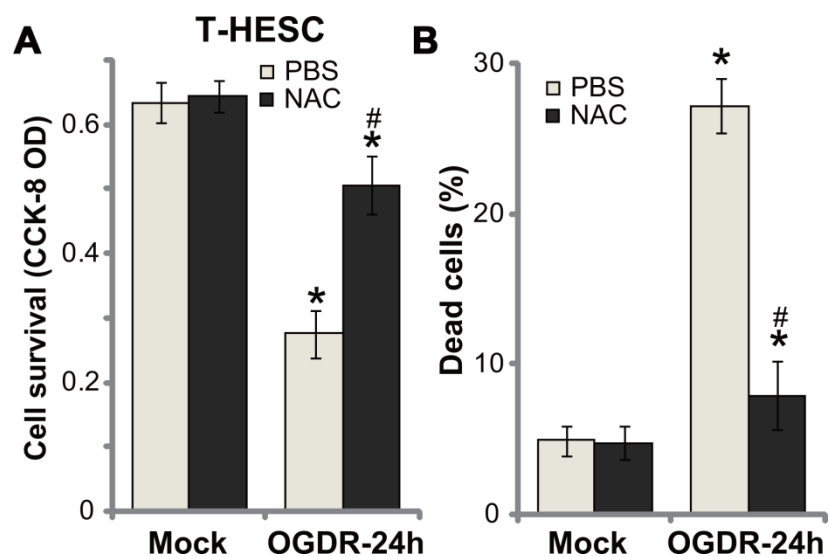

**Supplementary Figure 1.** T-HESC cells were pretreated with anti-oxidant N-acetylcysteine (NAC, 500  $\mu$ M) for 1h, followed by OGDR stimulation for 24h, cell survival and necrosis were tested by CCK-8 (A) and LDH release (B) assays, respectively. Data were presented as mean  $\pm$  SD (n=5). \*  $P < 0.05$  vs. PBS pretreatment in “Mock” cells. #  $P < 0.05$  vs. PBS pretreatment in “OGDR” cells. Experiments in this figure were repeated three times with similar results obtained.
